1 An evaluation of transcriptome-based exon capture for frog phylogenomics across  
2 multiple scales of divergence (Class: Amphibia, Order: Anura)

3

4 Daniel M. Portik<sup>1,2\*</sup>, Lydia L. Smith<sup>1,2</sup>, and Ke Bi<sup>1,3</sup>

5

6 <sup>1</sup> Museum of Vertebrate Zoology, University of California, Berkeley, CA 94720, USA

7 <sup>2</sup> Department of Integrative Biology, University of California, 3060 Valley Life Sciences

8 Building, Berkeley, CA 94720, USA

9 <sup>3</sup> Computational Genomics Resource Laboratory (CGRL), California Institute for

10 Quantitative Biosciences (QB3), University of California, Berkeley, CA 94720, USA

11

12 \*Corresponding author: [daniel.portik@berkeley.edu](mailto:daniel.portik@berkeley.edu)

13

14 **Keywords:** Transcriptome-based exon capture, amphibians, genomics, phylogenomics

15 **Abstract**

16 Custom sequence capture experiments are becoming an efficient approach for gathering  
17 large sets of orthologous markers with targeted levels of informativeness in non-model  
18 organisms. Transcriptome-based exon capture utilizes transcript sequences to design  
19 capture probes, often with the aid of a reference genome to identify intron-exon  
20 boundaries and exclude shorter exons (< 200 bp). Here, we test an alternative approach  
21 that directly uses transcript sequences for probe design, which are often composed of  
22 multiple exons of varying lengths. Based on a selection of 1,260 orthologous transcripts,  
23 we conducted sequence captures across multiple phylogenetic scales for frogs, including  
24 species up to ~100 million years divergent from the focal group. After several  
25 conservative filtering steps, we recovered a large phylogenomic data set consisting of  
26 sequence alignments for 1,047 of the 1,260 transcriptome-based loci (~630,000 bp) and a  
27 large quantity of highly variable regions flanking the exons in transcripts (~70,000 bp).  
28 We recovered high numbers of both shorter (< 100 bp) and longer exons (> 200 bp), with  
29 no major reduction in coverage towards the ends of exons. We observed significant  
30 differences in the performance of blocking oligos for target enrichment and non-target  
31 depletion during captures, and observed differences in PCR duplication rates that can be  
32 attributed to the number of individuals pooled for capture reactions. We explicitly tested  
33 the effects of phylogenetic distance on capture sensitivity, specificity, and missing data,  
34 and provide a baseline estimate of expectations for these metrics based on nuclear  
35 pairwise differences among samples. We provide recommendations for transcriptome-  
36 based exon capture design based on our results, and describe multiple pipelines for data  
37 assembly and analysis.

38

## 39 **Introduction**

40 Using high throughput sequencing, there are now a variety of approaches available to  
41 generate large molecular data sets for the purpose of addressing population genetics or  
42 phylogenetics questions. A majority of these approaches fall in the category of reduced  
43 representation sequencing, in which orthologous sets of markers from a subset of the  
44 genome are obtained across taxa or individuals. A commonly used approach is RAD-seq,  
45 which targets anonymous loci adjacent to restriction enzyme sites (Miller et al. 2007),  
46 though the probability of obtaining orthologous sets of loci decreases as phylogenetic  
47 distance between samples increases (Rubin et al. 2012; Arnold et al. 2013). Other  
48 approaches include more targeted selection of loci using DNA or RNA probes, such as  
49 ultra-conserved element (UCE) sequencing (Faircloth et al. 2012) and anchored hybrid  
50 enrichment (Lemmon et al. 2012). Both approaches rely on short, highly conserved  
51 genomic regions for probe design and the subsequent capture of these targets for libraries  
52 with large insert sizes containing stretches of flanking sequences. This allows the use of  
53 the same set of markers across distantly related taxa, but the function of these loci is  
54 generally unknown, and the levels of variation in flanking regions are not predictable.  
55 Other targeted sequence capture approaches allow more control over the level of  
56 variation of orthologous markers, including sequence capture using PCR-generated  
57 probes (SCPP) (Peñalba et al. 2014), and transcriptome-based exon capture (Bi et al.  
58 2012). The latter approach uses transcriptome sequencing to identify protein-coding  
59 exons across populations or species, and is particularly useful for organisms for which no  
60 other genomic resources are readily available.

61           An important step before selecting markers derived from transcriptome sequences  
62 involves the identification of intron-exon boundaries to select longer exons, which  
63 requires the use of reference genomes (Bi et al. 2012; Bragg et al. 2015). Longer exons  
64 are preferred because they exceed the length of capture probes, allowing tiling, and for a  
65 given evolutionary rate they should have more informative sites compared to shorter  
66 exons. The transcriptome sequences recovered are typically composed of multiple exons,  
67 often short in length, making probe design challenging. The intron-exon identification  
68 step can be exceedingly difficult if the reference genome is too distantly related, and the  
69 direct use of transcriptome sequences for probe design is an alternative that has not been  
70 explored. Although this alternative approach ignores the potential presence of intron-  
71 exon boundaries, it offers an opportunity to capture exons of a variety of lengths along  
72 with their associated non-coding flanking regions. The length of probes, level of  
73 divergence between probes and targets, length distribution of genomic library fragments,  
74 and the number of and lengths of exons in the transcript sequences are all important  
75 factors that could determine the success of this alternative approach.

76           There are several major challenges for designing a custom sequence capture  
77 experiment for a non-model organism, particularly if the experiment involves species  
78 with relatively large genome sizes, spans multiple phylogenetic scales, and involves the  
79 *de novo* generation of genetic resources for probe design. In addition, wet-lab-specific  
80 decisions have the potential to significantly influence the outcome of sequence captures,  
81 including the number of genomic libraries to pool per capture reaction and the choice of  
82 genomic library blocking oligos. Few studies have focused on the exploration of these

83 topics across a single experiment, yet the availability of baseline information can help  
84 inform these decisions and improve the success of sequence capture.

85         Across terrestrial vertebrates, amphibians exhibit the largest genome sizes. The  
86 average genome size of frogs is 5.0 gigabases (Gb) (max = 13.1 Gb, n = 497), whereas  
87 the salamander genome averages 34.5 Gb (max = 117.9 Gb, n = 426) (Gregory 2015).  
88 These genome sizes are larger than those of birds (1.3 Gb, n = 896), mammals (3.1 Gb, n  
89 = 777), and squamates (2.1 Gb, n = 344) (Gregory 2015), and the performance of targeted  
90 exon capture for amphibians remains largely unexplored (but see Hedtke et al. 2013;  
91 McCartney-Melstad et al. 2015). Here, we examine the performance of transcriptome-  
92 based exon capture for frogs across multiple phylogenetic scales. The main focal group  
93 is the African frog family Hyperoliidae, consisting of 13 genera and 254 samples, which  
94 have an average genome size of 4.6 Gb (n = 11) (Gregory 2025). Our sampling also  
95 includes species from the sister family Arthroleptidae (7 genera, 7 samples), and a single  
96 representative from three more distantly related families (Brevicipitidae, Hemisotidae,  
97 Microhylidae). Pairwise comparisons within Hyperoliidae do not exceed 10% nuclear  
98 divergence, and the hyperoliid genera shared a common ancestor approximately 56  
99 million years ago (Portik & Blackburn, in prep). The family Hyperoliidae shares a  
100 common ancestor with Arthroleptidae approximately 77 Ma, with Hemisotidae and  
101 Brevicipitidae approximately 93 Ma, and with Microhylidae approximately 103 Ma, and  
102 uncorrected pairwise nuclear differences between hyperoliids and the outgroups  
103 approaches 20%.

104         We describe our methodological approach for generating and mining  
105 transcriptome resources, the selection of orthologous markers and probe design, choice of

106 blocking oligos in capture reactions, the pipeline for assembling and processing capture  
107 sequence data, and the overall results of our exon capture experiment. Given the  
108 tremendous level of divergence between our focal group and available frog reference  
109 genomes (*Xenopus laevis* and *X. tropicalis*, minimum 150 million years divergent), we  
110 did not attempt to identify intron-exon boundaries to select longer exons. Rather, we use  
111 transcriptome sequences directly for probe design. We evaluate our results given this  
112 approach, including characterizing the number of exons in transcript sequences, the  
113 lengths of these exons, our ability to recover exons and their flanking regions, and the  
114 effects of exon length on sequencing depth. The level of variation within the family  
115 Hyperoliidae and the inclusion of highly divergent outgroup taxa allows us to examine  
116 the effects of phylogenetic divergence on exon capture performance. Specifically, we  
117 examine the relationship between phylogenetic distance on exon capture sensitivity,  
118 specificity, and the proportion of missing data in the final sequence alignments. We also  
119 examine the effects of library pool size during multiplexed captures on raw data yield,  
120 sequencing depth, and read duplication levels.

121

## 122 **Methods**

### 123 *Transcriptome Sequencing and Analysis*

124 Four species of hyperoliids representing multiple divergent clades were chosen for  
125 transcriptome sequencing: *Afrivalus paradorsalis* (CAS 255487), *Hyperolius balfouri*  
126 (CAS 253644), *Hyperolius riggenbachi* (CAS 253658), and *Kassina decorata* (CAS  
127 253990). Whole RNA from a portion of liver sample preserved in RNA Later was  
128 extracted using the RNeasy Protect Mini Kit (Qiagen). Samples were evaluated using a

129 BioAnalyzer 2100 RNA Pico chip (Agilent), with RIN scores of 7.0, 7.0, 7.4, and 5.5,  
130 respectively. Sequencing libraries were prepared using half reactions of the TruSeq RNA  
131 Library Preparation Kit V2 (Illumina), beginning with Poly-A selection for samples with  
132 high RIN scores ( $> 7.0$ ) and Ribo-Zero Magnetic Gold (Epicentre) ribosomal RNA  
133 removal for samples with low RIN scores ( $< 7.0$ ). Libraries were pooled and sequenced  
134 on an Illumina HiSeq2500 with 100 bp paired-end reads. Transcriptomic data were  
135 cleaned following Singhal (2013). Cleaned data were assembled using TRINITY (Grabherr  
136 et al. 2011) and annotated with *Xenopus tropicalis* (Ensembl) as a reference genome  
137 using reciprocal BLASTX (Altschul et al. 1997) and EXONERATE (Slater & Birney 2005).  
138 We then compared annotated transcripts from the four species to search for orthologs via  
139 BLAST (Altschul et al. 1990). We removed mitochondrial loci from the transcripts. We  
140 only kept transcripts with a GC between 40%-70% because extreme GC content causes a  
141 reduced capture efficiency for the targets (Bi et al. 2012). Orthologous transcripts with a  
142 minimum length of 500 base pairs (bp) were identified across all four samples, resulting  
143 in the identification of 2,444 shared transcripts. Transcripts exceeding 850 bp were  
144 arbitrarily trimmed to this length for probe design, reflecting a trade-off decision between  
145 locus length and the total number of loci included in the experiment. The average  
146 pairwise divergence across transcripts among all four samples ranged from 1.4% to  
147 25.9%.

148

149 *Availability of Transcriptome Tools.* All the bioinformatics pipelines for transcriptome  
150 data processing and annotation are available at <https://github.com/CGRL-QB3->

151 [UCBerkeley/DenovoTranscriptome](https://github.com/UCBerkeley/DenovoTranscriptome). Pipelines for marker development are available at  
152 <https://github.com/CGRL-QB3-UCBerkeley/MarkerDevelopmentPylogenomics>.

153

#### 154 *Sequence-Capture Probe Design*

155 The orthologous transcripts were subjected to additional filtering steps before a final gene  
156 set was chosen. The initial filtering step applied upper and lower limits on average  
157 transcript divergence, eliminating loci with low variation (< 5.0% average divergence)  
158 and exceptionally high variation (> 15.0% average divergence), resulting in the removal  
159 of 266 genes. The remaining 2,178 genes were examined for repetitive elements, short  
160 repeats, and low complexity regions, which are problematic for probe design and capture.  
161 The four sets of transcripts per gene (totaling 8,712 sequences) were screened using the  
162 REPEATMASKER Web Server (Smit et al. 2015). This step resulted in the masking of  
163 repetitive elements or low complexity regions in 929 sequences, with 7,783 sequences  
164 passing the filters. To be conservative, if any of the four transcripts for a gene contained  
165 masked sites, that gene was removed from the final marker set, which resulted in the  
166 removal of an additional 468 markers. From this reduced set of 1,710 markers, 400  
167 markers with the highest divergence were selected (average divergence ranging from  
168 10.4% to 14.9%) followed by 860 randomly drawn markers from the remaining subset.  
169 This marker set was supplemented with five positive controls, which consisted of nuclear  
170 sequence data generated using Sanger sequencing for five loci: *POMC* (624 bp), *RAG-1*  
171 (777 bp), *TYR* (573 bp), *FICD* (524 bp), and *KIAA2013* (540 bp). The final marker set  
172 selected for probe design included 1,265 genes from four species and 5,060 individual  
173 sequences.



174           The final filtered gene set was used to design a MYaits-3 custom bait library  
175 (MYcroarray), which consists of 60,060 unique probes per reaction and a total of 48  
176 capture reactions. Following the manufacturers recommendation for capturing sequences  
177 of species greater than 5% divergent, 120mer baits were selected, rather than 100mer or  
178 80mer baits. For each locus, we included a sequence from each of the four species; the  
179 5,060 sequences included for probe design totaled 3,983,022 bp, which is approximately  
180 995,700 bp for each full set of loci per species. Following a 2x tiling scheme (every 60  
181 bp) resulted in 60,179 unique baits, therefore 119 probes were randomly dropped to  
182 achieve the probe limit.

183

#### 184 *Genomic Library Preparation and Pooling*

185 Genomic DNA was extracted from 264 samples (254 ingroup samples, 10 outgroups)  
186 using a high-salt extraction method (modified from Aljanabi and Martinez 1997). The  
187 DNA was quantified by Qubit DNA BR assay (Life Technologies) and 1700 ng total  
188 DNA was diluted in 110  $\mu$ l of ultrapure H<sub>2</sub>O. A Bioruptor UCD-200 (Diagenode) was  
189 used to sonicate the samples on a low setting for 15 minutes, using 30s on/30s off  
190 cycling. For each sonicated sample, 4.5  $\mu$ l of product was run on a 1% gel at 135V for 35  
191 min to ensure fragments were appropriately sized (100–500 bp, average 200–300 bp).  
192 Individual genomic libraries were prepared following Meyer and Kircher (2010), with  
193 slight modifications, including the use of at least 1600 ng total DNA for library  
194 preparation (rather than 500 ng) to remedy the possibility of decreased library diversity  
195 resulting from the larger genome size of frogs. We used 7 cycles of post-adaptor ligation  
196 PCR to enrich the libraries and incorporate a 7bp P7 index, allowing the combination of

197 up to 96 samples in the same sequencing lane. The resulting 50  $\mu$ l of amplified library  
198 product had an average concentration of 35 ng/ $\mu$ l measured by a Nanodrop 1000  
199 spectrophotometer (Thermo Scientific), producing an average yield of 1,750 ng total  
200 library DNA.

201 Samples were pooled for capture reactions according to phylogenetic relatedness  
202 as determined by 16S mtDNA data (Portik, unpublished data). Typical pools contained  
203 5–6 genomic libraries, but ranged from 1–7 libraries. All pools contained 1500 ng of  
204 total starting DNA, divided equally among the samples included in the pool.

205

#### 206 *Sequence Capture Reactions*

207 MYbaits capture reactions were performed following the v2.3.1 manual with some  
208 modifications. For each capture reaction library master mix, the pooled libraries were  
209 vacuum dried at 45°C for 70 min and re-suspended in ultrapure H<sub>2</sub>O, then combined with  
210 1.66  $\mu$ l each of human, mouse, and chicken COT-1, and choice of blocking oligos. The  
211 combined volume of water for DNA resuspension and volume of blocking  
212 oligonucleotides totaled 6.5  $\mu$ l. An initial three capture reactions were performed on the  
213 same library pool to assess the performance of three different types of oligonucleotide  
214 blockers designed to anneal to the library adapters during hybridization and prevent  
215 daisy-chaining. These blockers consist of the universal blocking oligos (included with  
216 the MYbaits kit) which use inosine to block the 7bp index sequence, short blocking  
217 oligos which leave the index sequence unblocked, and xGEN blocking oligos (Integrated  
218 DNA Technologies), which use proprietary modifications to block the index. Their  
219 performance was compared using qPCR analysis of amplified post-capture products,

220 examining enrichment of positive controls and depletion of negative controls. The xGEN  
221 blocking oligos performed significantly better in these tests (see Results); we assumed  
222 this assessment was a good proxy for sequencing results and these blocking oligos were  
223 used for all subsequent capture reactions.

224 Beyond the slight modifications to the hybridization reaction components  
225 discussed above, we followed the manufacturer's protocol as written, and the  
226 hybridization reaction proceeded at 65°C for 27 hours. Individual capture reactions were  
227 purified using streptavidin-coated magnetic beads and post-capture products were PCR  
228 amplified using four independent reactions of 14 cycles each. These reactions were  
229 resuspended in 12 µl of ultrapure H<sub>2</sub>O, and had an average concentration of 15 ng/µl, as  
230 measured by Nanodrop. Purified PCR products from the same capture were combined  
231 and quantified using a BioAnalyzer 2100 DNA 1000 chip. The combined post-capture  
232 amplified products were on average 3.7 ng/µl (range of averages: 1.1–7.2 ng/µl) and the  
233 average product size was 398 bp (range of averages: 361–466 bp). Results from Qubit  
234 assay were similar, with an average concentration of 4.5 ng/µl (range: 1.0–7.7 ng/µl) for  
235 combined post-capture amplified products. The combined post-capture libraries were  
236 grouped into three sets (totaling 74, 91, and 92 libraries), pooled in equimolar amounts,  
237 and sequenced on three lanes of an Illumina HiSeq2500 with 100 bp paired-end reads.  
238

### 239 *Sequence Capture Data Processing*

240 Raw sequence data were cleaned following Singhal (2013) and Bi et al. (2012). In brief,  
241 raw fastq reads were filtered using TRIMMOMATIC (Bolger et al. 2014) and CUTADAPT  
242 (Martin 2011) to trim adapter contaminations and low quality reads. BOWTIE2 (Langmead

243 & Salzberg 2012) was used to align the data to *Escherichia coli* (NCBI: 48994873) to  
244 remove potential bacteria contamination. We eliminated exact duplicates as well as low  
245 complexity sequences using a custom script. Overlapping paired reads were also merged  
246 using FLASH (Magoč & Salzberg) and COPE (Liu et al. 2012) to avoid inflated coverage  
247 estimate in the overlapping region. The resulting cleaned reads of each individual  
248 specimen were *de novo* assembled using ABYSS (Simpson et al. 2009). We first generated  
249 individual raw assemblies using a wide range k-mers (21, 31, 41, 51, 61 and 71) and then  
250 used CD-HIT-EST (Li & Godzik 2006), BLAT (Kent 2002), and CAP3 (Huang & Madan  
251 1999) to cluster and merge all raw assemblies into final, less-redundant assemblies. We  
252 used BLASTN (evalue cutoff = 1e-10, similarity cutoff = 70) to compare the 5,060 target  
253 sequences with the raw assemblies of each individual in order to identify the set of  
254 contigs that were associated with targets (in-target assemblies). We also ran a self-  
255 BLASTN (evalue cutoff = 1e-20) to compare the assemblies against themselves to mask any  
256 regions from a contig that matched other regions from other contigs. For each matched  
257 contig we used EXONERATE (Slater & Birney 2005) to define protein-coding and flanking  
258 regions. We retained flanking sequences if they were within 500 bp of a coding region.  
259 Finally, all discrete contigs that were derived from the same reference transcript were  
260 joined together with Ns based on their relative BLAST hit positions to the reference. Most  
261 of the final in-target assemblies contain multiple contigs, and each includes both coding  
262 regions and flanking sequences if captured.

263 Cleaned sequence data were then aligned to the resulting individual-specific in-  
264 target assemblies using NOVOALIGN (Li & Durbin 2009) and we only retained reads that  
265 mapped uniquely to the reference. We used Picard

266 (<http://broadinstitute.github.io/picard/>) and GATK (McKenna et al. 2010) to perform re-  
267 alignment. We finally used SAMTOOLS/BCFTOOLS (Li et al. 2009) to generate individual  
268 consensus sequences by calling genotypes and incorporate ambiguous sites in the in-  
269 target assemblies. We kept a consensus base only when the site depth is above 5X. We  
270 masked sites within 5 bp window around an indel. We also filtered out sites where more  
271 than two alleles were called. We converted FASTQ to FASTA using seqtk  
272 (<https://github.com/lh3/seqtk>) and masked putative repetitive elements and short repeats  
273 using REPEATMASKER (Smit et al. 2015) with vertebrata metazoa as a database. We  
274 removed markers if more than 80% of the bases were Ns. We then calculated read depth  
275 of each individual marker and filtered out loci if the depth fell outside 1<sup>st</sup> and 99<sup>th</sup>  
276 percentile of the statistics. We also eliminated markers if the individual heterozygosity fell  
277 outside the 99<sup>th</sup> percentile of the statistics. The final filtered assemblies of each individual  
278 specimen were aligned using MAFFT (KAtoh & Standley 2013). Alignments were then  
279 trimmed using TRIMAL (Capella-Gutierrez et al. 2009). We removed alignments if more  
280 than 30% missing data (Ns) are present in 30% of the samples. We also removed  
281 alignments if the proportion of shared polymorphic sites in any locus is greater than 20%.

282

283 *Availability of Sequence Capture Data Tools.* The bioinformatic pipelines of sequence  
284 capture data processing are available at [https://github.com/CGRL-QB3-](https://github.com/CGRL-QB3-UCBerkeley/denovoTargetCapturePhylogenomics)  
285 [UCBerkeley/denovoTargetCapturePhylogenomics](https://github.com/CGRL-QB3-UCBerkeley/denovoTargetCapturePhylogenomics).

286

287 *Sequence Capture Efficiency Evaluation*

288 *Sequencing Depth, Duplication Levels, and Pooling Sizes.* To evaluate capture  
289 efficiency, average per-base sequence depth, or coverage, was calculated separately for  
290 the exon sequences and for the flanking sequences of each sample. The coverage at each  
291 base pair site for either data set was inferred using the SAMTOOLS (Li et al. 2009). The per  
292 base pair coverage estimates for all sequences (exon or flanking) associated with each  
293 transcript (up to 1,260 genes) were averaged, resulting in a set of average coverage  
294 estimates across loci. The resulting output of the set of average coverage estimates was  
295 used to infer the median, upper and lower quartiles, and range of coverage estimates  
296 using samples or genes as factors. These calculations were performed and automated  
297 across samples using python scripts and the output was visualized in R. Differences in  
298 the levels of coverage were examined using pooling size as a factor. To control for  
299 differences in coverage possibly resulting from phylogenetic distance, comparisons were  
300 only made among pools of the ingroup genus *Hyperolius* (160 samples, 28 captures).

301 Duplication refers to the number of non-unique sequencing reads, which were  
302 eliminated from our sequence capture data processing pipeline. The level of duplication  
303 among reads, expressed as a percentage, was estimated by dividing the number of  
304 duplicate reads by the total number of raw reads. Differences in the levels of duplication  
305 were examined using pooling size as a factor, compared across the genus *Hyperolius*. The  
306 amount of raw data (in bases) was also compared across pool sizes using the genus  
307 *Hyperolius*.

308

309 *Sequence Capture Sensitivity.* Sensitivity refers to the percentage of bases of target  
310 sequences that are covered by at least one read, and here the target refers to the exons of

311 each gene. To calculate this metric, the final in-target assemblies (including exons and  
312 flanking sequences) of each sample were compared to a set of transcript sequences used  
313 for probe design, from only one of the design species, using BLASTN with a evalue cutoff  
314 of 1e-10. This was automated using custom scripts to produce output files of all blast hits  
315 for each sample. For each output file, any overlapping base pair coordinates for blast hits  
316 within a locus were merged. Following the merging of coordinates, the number of base  
317 pairs for all exon blast hits per locus was totaled, and was divided by the total length of  
318 the transcript sequence to calculate the sensitivity per transcript. The total number of  
319 base pairs from all exon blast hits was divided by the total number of base pairs of all the  
320 transcript sequences, producing an overall estimate of sensitivity per sample.

321

322 *Sequence Capture Specificity*. Specificity is a metric that measures how many base pairs  
323 of cleaned reads are aligned to target sequences, expressed as a percentage. In this  
324 experiment, the target sequences are represented in two ways: in-target assemblies (exons  
325 and their associated flanking sequences), and exons only. For each sample, bam files  
326 were converted to sam file format using the SAMTOOLS view function and the total  
327 number of base pairs aligned within the exon sequences and flanking sequences were  
328 counted by parsing the bam files. To estimate base pairs aligned with transcript exon  
329 sequences only, the sample bam file was converted to sam format using the associated  
330 bed file containing base pair coordinates for exons only, and total aligned base pairs were  
331 calculated in the same manner. The number of cleaned read base pairs was calculated  
332 from the summing the read lengths contained within cleaned reads files.

333

334 *Exon Coverage Uniformity.* The uniformity of coverage across the length of exons was  
335 examined using both longer (> 200 bp) and shorter (61–100 bp) exons. Exons matching  
336 these criteria were filtered out from bed files containing exon coordinates independently  
337 for each sample. For longer exons, five bins of 10 bp increments were created for both  
338 the 5' and 3' ends, resulting in the generation of ten additional bed files per sample. For  
339 shorter exons, three bins of 10 bp increments were created for both the 5' and 3' ends,  
340 resulting in the generation of six additional bed files per sample. Each bed file was used  
341 to calculate the per base pair coverage for a specific end bin using SAMTOOLS. These per  
342 base pair coverage values were averaged within exons, and all averages of exons for a  
343 particular bin were subsequently combined across 50 randomly chosen samples. The  
344 values across bins were visualized in R to assess the median, upper and lower quartiles,  
345 and range of coverage estimates.

346

347 *Effects of Phylogenetic Distance.* We sought to test the relationship between  
348 phylogenetic distances and several evaluation metrics to determine if Sanger sequence  
349 data have predictive power for exon capture success. Phylogenetic distance was  
350 calculated as the average of uncorrected pairwise differences between samples and the  
351 four design species. These divergence estimates were calculated using the five positive  
352 controls (nuclear loci from Sanger sequencing). As this information would generally be  
353 available to researchers before designing such an experiment, these loci provide an a  
354 priori estimation of divergence across the focal group. The effects of phylogenetic  
355 distances on capture specificity, sensitivity, and duplication were investigated using  
356 simple linear regressions. The values for the above metrics were averaged for each



357 genus, providing values for a total of 23 genera for comparison. Average phylogenetic  
358 distances ranged from 6.7–18.3%, representing divergences up to 103 million years old  
359 (Portik & Blackburn, in prep).

360

361 *Evaluation of Exon Phylogenetic Informativeness.* The resulting alignments of exon-only  
362 data and flanking region data were evaluated for taxon number, sequence length,  
363 percentage of missing data, and proportion of informative sites. These results were  
364 visualized in R, and the relationship between the number of informative sites and  
365 alignment length was investigated using a simple linear regression. The relationship  
366 between phylogenetic distance and missing data was also investigated using a simple  
367 linear regression. The percentage of missing data was calculated from the final  
368 concatenated alignment of exon-only loci that passed multiple post-processing filters,  
369 including a minimum length of 90 bp, no more than 80% missing data per sequence in  
370 alignments, and no more than 30% total missing data across an alignment. These filters  
371 were enforced using a custom alignment refinement python script for all alignments.

372

373 *Availability of bioinformatics tools.* All custom python scripts for sequence capture  
374 performance evaluation are available on github (<https://github.com/dportik/>). These  
375 include tools for automating the calculation of coverage, duplication, sensitivity,  
376 specificity, and coverage uniformity. Additional scripts are available for evaluating and  
377 refining DNA sequence alignments.

378

379 **Results**

380 *Effects of Blocking oligos*

381 Quantitative PCR reactions were performed for a positive control nuclear locus  
382 (KIAA2013) targeted by the hybridization probes and a negative control nuclear locus  
383 (49065) not targeted by the capture probes. All reactions were standardized for the same  
384 input amount of DNA (4ng). For the positive control, all post-capture curves show an  
385 expected leftward shift relative to the pre-capture, indicating that the concentration of  
386 copies of the KIAA2013 locus has increased significantly in the post-capture library  
387 pools. Of the three blocker types, the greatest change in enrichment is observed with the  
388 post-capture pool using xGen blocking oligos (11.9 cycle shift), rather than the universal  
389 blocking oligos or short blocking oligos (10.3 cycle shifts) (Fig. 1). For the negative  
390 control, all post-capture curves show an expected rightward shift relative to the pre-  
391 capture, indicating that the concentration of copies of the 49065 locus has decreased in  
392 the post-capture library pools. However, the universal blocking oligos and short blocking  
393 oligos show only minor differences from the pre-capture library (1.9 and 1.0 cycle shifts  
394 respectively) (Fig. 1). In contrast, the post-capture pool using xGen blocking oligos has  
395 shifted considerably (10.3 cycle shift), indicating that non-target regions have been  
396 significantly depleted from the library pool (Fig. 1). This is reflected in the post-capture  
397 library quantification, in which higher amounts of DNA were detected in the universal  
398 blocker reaction (23 ng/ $\mu$ L) and short blocker reaction (23.7 ng/ $\mu$ L), compared to the  
399 xGen reaction (14 ng/ $\mu$ L), indicating that more non-targeted sequences were accidentally  
400 captured during the hybridization.

401

402 *Sequence Capture Data*

403 The average number of reads sequenced across the 264 samples is 2,422,484 (range:  
404 415,439–6,899,259 reads), and as we sequenced 100 bp paired-end reads, the average  
405 total base pair yield is 484.4 Mb (range: 83.0–1,379.8 Mb). In addition to the removal of  
406 low complexity and low quality reads, the raw reads were filtered to remove exact  
407 duplicates, adapters, and bacteria contamination. After these filtration steps, the average  
408 number of base pairs of cleaned reads was 331.9 Mb (range: 65.3–789.6 Mb); on average  
409 68% of the raw base pairs passed the quality control filters.

410 The assemblies were assigned to targeted transcripts, and the resulting in-target  
411 assemblies contained a mix of exon sequences and non-coding flanking sequences (Fig.  
412 2A). The length of the in-target assemblies were often several thousand base pairs, much  
413 longer than the original targeted transcript sequences (which were maximally 850 bp),  
414 illustrating a significant amount of non-coding flanking sequence data associated with  
415 each exon was captured (Fig. 2A). By trimming the flanking sequences, the concatenated  
416 exons closely match the original transcript sequence lengths (Fig. 2B). Across all  
417 targeted loci and samples, the median number of exons per transcript is four, but ranged  
418 from a single exon to eleven exons per transcript (Fig. 3). The average length of exons  
419 within transcripts recovered is 153 bp, but the data set revealed a wide range in sizes,  
420 from shorter exons (< 100 bp) to longer exons (> 600 bp) that cover the entire transcript  
421 sequence used (Fig. 4).

422

### 423 *Sequencing Depth and Duplication Levels*

424 The sequencing depths of merged contigs showed variation between loci and across  
425 samples, but the most pronounced differences in coverage occurred between the exon and

426 flanking regions (Fig. 2A). The average sequencing depth across all exons for all  
427 samples averaged 142.4X (n = 1,372,603 exons), whereas the flanking regions averaged  
428 45.5X. This result is consistent with expectations for transcriptome-based exon capture,  
429 as the probe design only considered exon regions. Despite not specifically targeting these  
430 adjacent non-coding regions, this experiment clearly demonstrates non-coding regions  
431 can be captured and sequenced with sufficiently high coverage. Because the estimates of  
432 sequencing depth only consider sites that are captured, relating coverage to phylogenetic  
433 distance is not a meaningful metric. We did consider the effect of pooling size on  
434 coverage, but within a single genus that was the main focus of the experiment and for  
435 which capture results were very similar (genus *Hyperolius*). A comparison of pool sizes  
436 (1–2, 4–7) revealed no significant differences in sequencing depth across all loci based on  
437 the student's t-test (Fig. 5). Similarly, there do not appear to be to be differences in raw  
438 data yield (in total base pairs) for different pool sizes (Fig. 5), though low sample sizes in  
439 smaller pools preclude rigorous testing.

440       The duplication levels among reads are an indicator of the diversity of sequences  
441 captured, with high duplication implying a less diverse post-capture library relative to  
442 post-capture libraries with lower duplication levels. In general, a higher number of post-  
443 capture PCR cycles are expected to produce higher levels of duplication among samples.  
444 In this experiment, all post-capture PCR reactions used the same number of cycles;  
445 therefore, our comparison of duplication levels is an indicator of post-capture sequence  
446 diversity rather than a methodological artifact. Levels of duplication were similar  
447 between the ingroup (average: 17.2%, range: 3.4%–37.9%) and outgroups (average:  
448 16.5%, range: 5.0%–24.8%). We tested for a relationship between duplication level and

449 phylogenetic distance using a simple linear regression, and found the regression was not  
450 significant ( $F(1, 21) = 0.79$ ,  $p = 0.38$ ). Though phylogenetic relatedness may not be a  
451 predictor of duplication levels, there is a clear pattern of differences in duplication levels  
452 across pooling sizes (Fig. 5). Pools with a single individual or two individuals have  
453 much lower duplication levels (3.9% and 5.1%, respectively) than pools with four or  
454 more individuals (range of averages: 15.7%–19.0%) (Fig. 5). Small samples sizes  
455 precluded statistical testing for these differences between smaller and larger pools, but  
456 these data indicate pooling size is much more likely to affect duplication levels than other  
457 factors such as phylogenetic distance. We did not find significant differences in  
458 duplication levels between larger pools, and this strongly suggests pooling seven  
459 individuals did not negatively impact the resulting diversity of sequences captured among  
460 samples. Additional replicate captures of larger pool sizes can help determine at which  
461 point captured sequence diversity is impacted and establish limitations in pooling sizes  
462 for successful capture.

463

#### 464 *Exon Coverage Uniformity*

465 Using 50 random ingroup samples, sequencing depth values were calculated for the edges  
466 of exons in 10 base pair bins, with 5 bins included for longer exons ( $> 200$  bp) and 3 bins  
467 included for shorter exons (61–100 bp). At the 5' and 3' ends of longer exons, the  
468 average coverage is 117.2X and 124.0X, respectively (Fig. 6, Table 1). These values  
469 increase slightly across bins towards the center, with both the 5' and 3' 41–50 bp bins  
470 having approximately 165X coverage (Fig. 6, Table 1). The coverage values for edge  
471 bins of shorter exons were lower, but in general showed the same trend increasing

472 towards the center (Fig. 7, Table 2). Here, the average coverage of the 5' and 3' ends is  
473 74.9X and 80.4X, respectively, with the most central bins (21–30 bp) exhibiting 83.7X  
474 and 86.2X coverage (Fig. 7, Table 2). Together, these results indicate high uniformity in  
475 sequencing depth across the length of short exons, and demonstrate only a slight decrease  
476 in coverage towards the edges of longer exons.

477

#### 478 *Sensitivity, Specificity, and the Effects of Phylogenetic Divergence*

479 We explored capture sensitivity, the percentage of bases of in-target assemblies that are  
480 covered by at least one read, across all samples in our experiment. In general, sensitivity  
481 varied between genera but was relatively consistent within genera (Fig. 8A). The average  
482 across all ingroup samples is 80.1% (range 52.1%–91.8%), whereas outgroup samples  
483 averaged 33.8% (range 20.7%–42.2%). A simple linear regression was calculated to  
484 predict sensitivity (%) based on phylogenetic distance. A significant regression equation  
485 was found ( $F(1, 21) = 79.58, p < 0.001$ ), with an adjusted  $R^2$  of 0.78 (Fig. 9). Sensitivity  
486 is equal to  $[108.19 + -4.57 * (\text{average pairwise divergence})]$  percent when pairwise  
487 divergence is measured as a percent; sensitivity decreased 4.57% for each percent  
488 increase of pairwise divergence.

489       Specificity is a metric similar to sensitivity, but it measures the percentage of base  
490 pairs of cleaned reads that can be aligned to target sequences. We investigated specificity  
491 using the in-target assemblies (exons and flanking regions) and exons only. Specificity  
492 varied among genera (Fig. 8B), and across all ingroup samples averaged 60.2% (range  
493 32.0%–73.0%), whereas outgroup samples averaged 35.6% (range 15.0%–50.0%). As  
494 expected, specificity of the exon only data set was lower, and ingroup genera exhibited

495 higher specificity (47.3%, range: 26.0%–65.0%) than outgroup genera (27.7%, range:  
496 13.0%–40.0%). Using specificity results from the in-target assemblies, a simple linear  
497 regression was calculated to predict specificity (%) based on phylogenetic distance. A  
498 significant regression equation was found ( $F(1, 21) = 44.1, p < 0.001$ ), with an adjusted  
499  $R^2$  of 0.66 (Fig. 9). Specificity is equal to  $83.99 + -3.26*(\text{average pairwise divergence})$   
500 percent when pairwise divergence is measured as a percent. Specificity decreased 3.26%  
501 for each percent increase of pairwise divergence.

502

### 503 *Sequence Alignments and Informativeness*

504 There were a total of 1,047 exon-only alignments and 287 flanking region alignments that  
505 passed all filtering criteria. Together, the concatenated alignment of flanking and exon  
506 data totals 631,127 base pairs.

507 For exon-only alignments, the average number of taxa included is 250, average  
508 per locus length is 536 bp, average level of missing data is 8.9%, and the average  
509 proportion of informative sites is 38.3%. The concatenated alignment of the exon-only  
510 loci totals 561,180 base pairs. The average proportion of missing data in the  
511 concatenated alignment for the ingroup samples is 10.7% (range 3%– 35%), and is 55.1%  
512 (range 43%– 74%) for the outgroup samples. A simple linear regression was calculated  
513 to predict missing data levels in the final exon-only alignments, based on phylogenetic  
514 distance. A significant regression equation was found ( $F(1, 21) = 96.78, p < 0.001$ ), with  
515 an adjusted  $R^2$  of 0.81 (Fig. 9). Missing data is equal to  $[-22.07 + 4.76*(\text{average pairwise}$   
516  $\text{divergence})]$  percent when pairwise divergence is measured as a percent. Missing data  
517 increased 4.76 percent for each percent increase of pairwise divergence. A simple linear

518 regression was also calculated to predict the number of informative sites in an exon-only  
519 locus based on the length of the locus. A significant regression equation was found ( $F(1,$   
520  $1045) = 5666, p < 0.001$ ), with an adjusted  $R^2$  of 0.84 (Fig. 10). The number of  
521 informative sites is equal to  $[-1.89 + 0.38 * (\text{alignment length})]$ . Informative sites  
522 increased 0.38 base pairs for each base pair increase in alignment length (Fig. 10).

523 For flanking region alignments, the average number of taxa included is 250, the  
524 average length is 243 bp, the average level of missing data is 12.4%, and the average  
525 proportion of informative sites is substantially higher than exon-only alignments at  
526 77.4%. The concatenated alignment of the flanking-only loci totals 69,947 base pairs.  
527 The average proportion of missing data in the concatenated alignment for the ingroup  
528 samples is 15.4% (range 6%– 40%), and is 50.6% (range 42%– 68%) for the outgroup  
529 samples. The non-coding flanking loci are generally more difficult to align, especially as  
530 phylogenetic distance increases. For the purpose of this study, we performed alignments  
531 across all samples, which is likely to have contributed to lower quality alignments and  
532 failure to pass specific missing data filters. We therefore emphasize if flanking sequence  
533 alignments are performed for the ingroup only, or even subclades of the ingroup, it  
534 should result in more and longer alignments recovered.

535

## 536 **Discussion**

537 We used a custom transcriptome-based exon capture, designed without the use of a  
538 reference genome, to successfully generate a large informative phylogenomic data set  
539 across divergent lineages of frogs. We accomplished this using transcriptome sequences  
540 directly for probe design, resulting in the additional recovery of a significant amount of



541 highly variable non-coding sequence data. We generated sequence alignments for 1,047  
542 of the 1,260 transcriptome-based loci, with an average of 250 (of 264) taxa present per  
543 alignment. The combination of exon and flanking region data resulted in a concatenated  
544 alignment of 631,127 base pairs. Based on the results of our experiment, we discuss the  
545 overall efficiency of capture, results of using transcript sequences for probe design,  
546 effects of phylogenetic distance, and recommendations for pooling size and blocking  
547 oligos.

548         The effects of blocking oligos are non-trivial, and have great potential to affect  
549 the capture efficiency (Fig. 1). Although the enrichment of target loci is accomplished  
550 using short blockers, universal blockers, and xGen blockers, there are critical differences  
551 in the level of depletion of non-targeted loci among blockers. The xGen blockers  
552 significantly outperformed the short blockers and universal blockers in the depletion of  
553 non-targets (Fig. 1). The higher concentration of DNA in post-capture libraries of the  
554 universal and short blockers represents a large carry-over of non-targets, which ultimately  
555 translates to significant reductions in both sensitivity and specificity and increases in PCR  
556 duplication rates. This is particularly important to consider for organisms with larger  
557 genome sizes, such as amphibians, which are likely to suffer from reductions in  
558 sensitivity and specificity and higher duplication rates based on genome size alone. The  
559 cost of xGen blockers is significantly higher per reaction, but may ultimately reduce the  
560 amount of sequencing effort required to obtain high quality sequence data. We therefore  
561 strongly recommend the testing of blocking oligos using a qPCR assay before conducting  
562 the main capture experiment, as the specificity, sensitivity, and duplication levels can be  
563 greatly improved with appropriate blocking oligos.

564 A main question concerning sequence capture is simply how many individuals  
565 can be pooled in a reaction, which has important implications for reducing costs and  
566 increasing the sampling for a given project. We tested a range of pool sizes (1–7  
567 samples) within the genus *Hyperolius* (160 samples, 28 captures) to determine the effects  
568 of pooling on raw data yield, sequencing depth, and duplication levels. We found no  
569 differences in raw data yield or sequencing depth across pools, but our results indicate  
570 duplication levels vary across pooling sizes (Fig. 5). We demonstrate duplication levels  
571 rose from 4–5% in 1–2 sample pools to an average of 15–19% in the 4–7 sample pools.  
572 These levels were acceptable for obtaining high quality sequence capture data for our  
573 experimental design. We did not detect a significant increase in duplication levels for  
574 pools of seven samples, suggesting the upper limit for sample pooling was not reached,  
575 though this topic requires additional investigation. Although pooling size does affect  
576 PCR duplication levels, we again emphasize that these effects can be strongly  
577 exacerbated through the use of less efficient blocking oligos.

578 Phylogenetic distance has a predictable effect on capture sensitivity, specificity,  
579 and the proportion of missing data in the final sequence alignments. As expected, more  
580 divergent species experienced drops in sensitivity and specificity, and their proportion of  
581 missing data increased (Fig. 9). Though these results are intuitive, our findings are  
582 useful in at least two ways. First, we demonstrate that for the most distant outgroup in  
583 our experiment (family Microhylidae), which shared a common ancestor with the probe  
584 design species 103 million years ago, we recovered 23% of the total exon sequence data  
585 (roughly 146,000 bp). Our experiment was focused on sequence capture within a single  
586 family, but successful sequence capture occurred for highly divergent outgroup species,

587 albeit with a predictable reduction in efficiency. Second, the regression equations  
588 relating capture efficiency metrics to average pairwise divergence can serve as a starting  
589 point for other researchers in determining the phylogenetic breadth of their capture  
590 experiments. Our comparisons are made using nuclear sequence data generated prior to  
591 our experiment. These empirical data, though based on frogs, allow an approximation of  
592 the effects of phylogenetic distance on metrics generally used to characterize capture  
593 efficiency, and can set realistic expectations for the overall success of sequence capture  
594 based on phylogeny. This approximation requires Sanger sequencing only a small  
595 number of nuclear loci for a subset of the target group, information that should generally  
596 be acquired before beginning a large-scale capture experiment.

597         Our experimental design used transcriptome sequences of four species from  
598 divergent ingroup clades to design capture probes, and we recovered high quality  
599 sequence data across the ingroup genera. The use of four sets of sequences for each locus  
600 ultimately reduced the total number of loci that were included in our probe design, and  
601 the trade-off between number of loci and variability in probe design is important to  
602 consider for exon capture design. Unfortunately we cannot assess whether probe sets  
603 from certain species were more efficient in capturing sequences, and it is unclear how  
604 using a single species would have affected the outcome of this experiment. Using a  
605 single species for probe design in our case would have allowed for the inclusion of  
606 approximately 5,000 loci, rather than 1,260. A possibility for reducing the number of  
607 design species is to reconstruct ancestral sequences for deeper nodes of the ingroup, and  
608 use these sequences for probe design. Though there are many options for probe design,

609 our results demonstrate sampling multiple divergent ingroup species is a highly effective  
610 strategy for capture across larger phylogenetic scales.

611 Our experiment tested the direct use of transcriptome sequences for probe design,  
612 thereby circumventing the use of reference genomes for identifying intron-exon  
613 boundaries to filter out short exons. This approach was highly successful, and we  
614 recovered short and long exons with a high uniformity in coverage (Figs. 6, 7) as well as  
615 a large quantity of highly variable non-coding flanking regions. The average size of  
616 individual exons (153 bp) within loci is close to predictions of average exon lengths  
617 across the genome of *Xenopus laevis* (~200 bp), and we found most of the 850 bp  
618 transcriptome sequences contained four exons (Figs. 3, 4). We successfully captured  
619 large quantities of short exons (< 100 bp) (Fig. 4), a feature that may be appealing for  
620 researchers targeting short loci. The probe design spanning intron-exon boundaries did  
621 not reduce coverage towards the ends of exons (Figs. 6, 7), and returned thousands of  
622 base pairs of non-coding flanking sequences per in-target assembly. The resulting  
623 alignments of non-coding regions show high levels of variation, with an average  
624 proportion of 77% informative sites (compared to 38% of exon-only regions). These  
625 flanking regions can be incorporated into population genetics or phylogenetic analyses,  
626 similar to UCE and anchored hybrid enrichment approaches. Our pipeline allows  
627 alignments to be made with the full in-target assemblies, exon regions only, or flanking  
628 regions only, providing flexibility for decisions about sequence data analysis.

629 Transcriptome-based exon capture is an effective method for producing large sets  
630 of orthologous markers with predictable levels of informativeness in non-model systems.  
631 This method can be applied to population level questions by sequencing transcriptomes

632 within a population, or applied to larger phylogenetic scales using the transcriptomes of  
633 divergent species. As this approach and other types of sequence capture gain popularity,  
634 the reporting of empirical data can enhance the ability of researchers to choose the  
635 appropriate capture approach or aid in the design of custom sequence captures. We have  
636 outlined our experimental design, including probe design from transcriptome sequences,  
637 as well as reaction-specific decisions about blockers and capture pooling schemes. For  
638 this type of transcriptome-based exon capture, information about the number of exons in  
639 transcripts, their lengths, and the recovery of flanking sequences should be discussed.  
640 Finally, efforts to relate any of the above measures to phylogenetic distance would  
641 greatly benefit researchers planning a sequence capture experiment for non-model  
642 systems.

643

#### 644 **Acknowledgments**

645 Lab work conducted by DMP was funded by a National Science Foundation DDIG  
646 (DEB: 1311006), the EECG Research Award (American Genetic Association), and by  
647 D.C. Blackburn, R.C. Bell, and J.A. McGuire. This work used the Vincent J. Coates  
648 Genomics Sequencing Laboratory at UC Berkeley, supported by NIH S10  
649 Instrumentation Grants S10RR029668 and S10RR027303. DMP thanks many  
650 collaborators and institutions for tissue samples processed in this study, and they will be  
651 recognized as co-authors or fully acknowledged in the resulting phylogenetic study in  
652 prep. DMP also thanks Sean Reilly and Ammon Corl for help in lab training and  
653 troubleshooting.

654

655 **References**

- 656 Aljanabi S, Martinez I (1997) Universal and rapid salt-extraction of high quality genomic  
657 DNA for PCR-based techniques. *Nucleic Acids Research*, **25**, 4692–4693.
- 658 Altschul SF, Gish W, Miller W, Myers EW, Lipman DJ (1990) Basic local alignment  
659 search tool. *Journal of Molecular Biology*, **215**, 403–410.
- 660 Altschul SF, Madden TL, Schäffer AA, Zhang J, Zhang Z, Miller W, and Lipman DJ  
661 (1997) Gapped BLAST and PSIBLAST: a new generation of protein database search  
662 programs. *Nucleic Acids Research*, **25**, 3389–3402.
- 663 Arnold B, Corbett-Detig RB, Hartl D, Bomblies K (2013) RADseq underestimates  
664 diversity and introduces genealogical biases due to nonrandom haplotype sampling.  
665 *Molecular Ecology*, **22**, 3179–3190.
- 666 Bi K, Vanderpool D, Singhal S, Linderoth T, Moritz C, Good JM (2012) Transcriptome-  
667 based exon capture enables highly cost-effective comparative genomic data collection  
668 at moderate evolutionary scales. *BMC Genomics*, **13**, 403.
- 669 Bolger AM, Lohse M, Usadel B (2014) Trimmomatic: a flexible trimmer for Illumina  
670 sequence data. *Bioinformatics*, **30**, 2114–2120.
- 671 Bragg JG, Potter S, Moritz CG (2015) Exon capture phylogenomics: efficacy across  
672 scales of divergence. *Molecular Ecology Resources*, Online Early View.
- 673 Capella-Gutierrez S, Silla-Martinez JM, Gabaldon T (2009) trimAl: a tool for automated  
674 alignment trimming in large-scale phylogenetic analyses. *Bioinformatics*, **25**, 1972–  
675 1973.

- 676 Faircloth BC, McCormack JE, Crawford NG, Harvey MG, Brumfield RT, Glenn TC  
677 (2012) Ultraconserved elements anchor thousands of genetic markers spanning  
678 multiple evolutionary timescales. *Systematic Biology*, **61**, 717–726.
- 679 Grabherr M, Haas BJ, Yassour M, Levin JZ, Thompson DA, Amit I, Adiconis X, Fan L,  
680 Raychowdhury R, Zeng Q, Chen Z, Mauceli E, Hacohen N, Gnirke A, Rhind N, di  
681 Palma F, Birren BW, Nusbaum C, Lindblad-Toh K, Friedman N, Regev A (2011)  
682 Full-length transcriptome assembly from RNA-Seq data without a reference genome.  
683 *Nature Biotechnology*, **15**, 644–652.
- 684 Gregory TR (2015) Animal Genome Size Database. [<http://www.genomesize.com>]
- 685 Hedtke SM, Morgan MJ, Cannatella DC, Hillis DM (2013) Targeted enrichment:  
686 maximizing orthologous gene comparisons across deep evolutionary time. *PLoS*  
687 *ONE*, **8**, e67908.
- 688 Huang X, Madan A (1999) CAP3: a DNA sequence assembly program. *Genome*  
689 *Research*, **9**, 868–877.
- 690 Katoh K, Standley DM (2013) MAFFT Multiple Sequence Alignment Software Version  
691 7: Improvements in Performance and Usability. *Molecular Biology and Evolution*, **30**,  
692 722–780.
- 693 Kent W (2002) BLAT—the BLAST-like alignment tool. *Genome Research*, **12**, 656–664.
- 694 Langmead B, Salzberg S (2012) Fast gapped-read alignment with Bowtie 2. *Nature*  
695 *Methods*, **9**, 357–359.
- 696 Lemmon AR, Emme SA, Lemmon EM (2012) Anchored hybrid enrichment for  
697 massively high-throughput phylogenomics. *Systematic Biology*, **61**, 727–744.

- 698 Li H, Durbin R (2009) Fast and accurate short read alignment with Burrows-Wheeler  
699 transform. *Bioinformatics*, **25**, 1754–1760.
- 700 Li H, Handsaker B, Wysoker A, Fennell T, Ruan J, Homer N, Marth G, Abecasis G,  
701 Durbin R, and 1000 Genome Project Data Processing Subgroup (2009) The sequence  
702 alignment/map (SAM) format and SAMtools. *Bioinformatics*, **25**, 2078–2079.
- 703 Li W, Godzik A (2006) CD-Hit: a fast program for clustering and comparing large sets of  
704 protein or nucleotide sequences. *Bioinformatics*, **22**, 1658–1659.
- 705 Liu B, Yuan J, Yiu S-M, Li Z, Xie Y, Chen Y, Shi Y, Zhang H, Li Y, Lam T-W, Luo R  
706 (2012) COPE: an accurate k-mer-based pair-end reads connection tool to facilitate  
707 genome assembly. *Bioinformatics*, **28**, 2870–2874.
- 708 Magoč T, Salzberg S (2011) FLASH: fast length adjustment of short reads to improve  
709 genome assemblies. *Bioinformatics*, **27**, 2957–2963.
- 710 Martin M (2011) Cutadapt removes adapter sequences from high-throughput sequencing  
711 reads. *EMBnet.journal*, **17**, 10–12.
- 712 McKenna A, Hanna M, Banks E, Sivachenko A, Cibulskis K, Kernytzky A, Garimella K,  
713 Altshuler D, Gabriel S, Daly M, DePristo MA (2010) The Genome Analysis Toolkit:  
714 a MapReduce framework for analyzing next-generation DNA sequencing data.  
715 *Genome Research*, **20**, 1297–1303.
- 716 McCartney-Melstad E, Mount GG, Shaffer HB (2015) Exon capture optimization in  
717 large-genome amphibians. *bioRxiv* doi: <http://dx.doi.org/10.1101/021253>.
- 718 Meyer M, Kircher M (2010) Illumina sequencing library preparation for highly  
719 multiplexed target capture and sequencing. *Cold Spring Harbor Protocols*, **2010(6)**,  
720 pdb.prot5448.



- 721 Miller MR, Dunham JP, Amores A, Cresko WA, and Johnson EA (2007) Rapid and cost-  
722 effective polymorphism identification and genotyping using restriction site associated  
723 DNA (RAD) markers. *Genome Research*, **17**, 240–248.
- 724 Peñalba JV, Smith LL, Tonione MA, Sass C, Hykin SM, Skipwith PL, McGuire JA,  
725 Bowie RC, Moritz C (2014) Sequence capture using PCR-generated probes: a cost-  
726 effective method of targeted high-throughput sequencing for nonmodel organisms.  
727 *Molecular Ecology Resources*, **14**, 1000–1010.
- 728 Rubin BER, Ree R, Moreau CS (2012) Inferring phylogenies from RAD sequence data.  
729 *PLoS ONE*, **7**, e33394.
- 730 Simpson J, Wong K, Jackman S, Schein J, Jones S, Birol I (2009) ABySS: a parallel  
731 assembler for short read sequence data. *Genome Research*, **19**, 1117–1123.
- 732 Singhal S (2013) *De novo* transcriptomic analyses for non-model organisms: an  
733 evaluation of methods across a multi-species data set. *Molecular Ecology Resources*,  
734 **13**, 403–416.
- 735 Smit AFA, Hubley R, Green P (2015) *RepeatMasker Open-4.0*.  
736 [<http://www.repeatmasker.org>]  
737  
738  
739

740 **Author Contributions**

741 This experiment was designed by all authors, and DMP performed lab work with  
742 significant assistance from KB and LLS. KB developed a substantial proportion of  
743 bioinformatics pipelines, with contributions from DMP. DMP wrote the manuscript, with  
744 contributions from KB and LLS, and all authors approved the final manuscript.

745

746 **Data Accessibility**

747 All the bioinformatics pipelines for transcriptome data processing and annotation are  
748 available at (<https://github.com/CGRL-QB3-UCBerkeley/DenovoTranscriptome>).  
749 Pipelines for marker development are available at (<https://github.com/CGRL-QB3-UCBerkeley/MarkerDevelopmentPylogenomics>). The bioinformatic pipelines of  
750 sequence capture data processing are available at (<https://github.com/CGRL-QB3-UCBerkeley/denovoTargetCapturePhylogenomics>). All custom python scripts for  
751 sequence capture performance evaluation are available on github  
752 (<https://github.com/dportik/>). These include tools for automating the calculation of  
753 coverage, duplication, sensitivity, specificity, and coverage uniformity. Additional  
754 scripts are available for evaluating and refining DNA sequence alignments. Molecular  
755 sequence data will be published in an associated manuscript in prep.

756

757

760 Figure 1. Quantitative PCR plots for the positive control nuclear locus (KIAA2013) and  
761 the negative control nuclear locus (49065). Assessment of the relative success of the  
762 capture can be made by comparing the position of the curves of the library pool prior to  
763 capture (black) to the three curves produced by library pools after capture using different  
764 blocking oligo strategies (blue, green, red). The largest cycle shifts in both enrichment  
765 and depletion occur using the xGen blocking oligos (red), with substantially better  
766 performance occurring for the depletion of non-targeted sequences.

767

768 Figure 2. An example sequencing depth (coverage) plot for (A) an in-target assembly  
769 and (B) exon-only contig of the same locus from one sample. Exons matching the  
770 transcript sequence used for probe design are colored green and labeled (A–E, matching  
771 in both plots), and non-coding flanking regions are colored orange. Both 50X and 10X  
772 coverage levels are indicated by dotted lines.

773

774 Figure 3. A frequency distribution for the number of exons detected in the fully  
775 assembled and merged contigs across all samples. The median number of exons per  
776 transcript is four.

777

778 Figure 4. A frequency distribution for the length of each exon detected within a fully  
779 assembled and merged contig, across all samples. The average length is 153 bp, and the  
780 median length is 132 bp.

781

782 Figure 5. Boxplots of pooling sizes and (A) duplication levels, (B) raw data yield, and (C)  
783 sequencing depth. The boxplots depict the median, upper and lower quartiles, and range  
784 for each metric.

785

786 Figure 6. The average binned coverage of the edges of long exons (> 200 base pairs).  
787 Bins are in 10 base pair increments, with five bins on the 5' and 3' ends. Estimates are  
788 based on 50 randomly chosen ingroup samples.

789

790 Figure 7. The average binned coverage of the edges of short exons (61–100 base pairs).  
791 Bins are in 10 base pair increments, with three bins on the 5' and 3' ends. Estimates are  
792 based on 50 randomly chosen ingroup samples.

793

794 Figure 8. Barplot of (A) sensitivity and (B) specificity, across all samples. Labels A–K  
795 refer to ingroup genera denoted by green (A: *Acanthixalus*, B: *Afrixalus*, C: *Cryptothylax*,  
796 D: *Heterixalus*, E: *Hyperolius*, F: *Kassina*, G: *Morerella*, H: *Opisthothylax*, I:  
797 *Paracassina*, J: *Phlyctimantis*, K: *Tachycnemis*) and labels L–O refer to outgroups  
798 denoted by orange (L: Arthroleptidae, M: Brevicipitidae, N: Hemisotidae, O:  
799 Microhylidae). Yellow indicates the species used for transcriptome sequencing and probe  
800 design.

801

802 Figure 9. Plots of linear regressions of (A) missing data from the concatenated exon  
803 alignment, (B) sensitivity, and (C) specificity, using the average pairwise divergence  
804 from probe design species as the independent variable.

805

806

807 Figure 10. Linear regression of alignment length and the number of informative sites.

808 Each dot represents a unique exon-only alignment, for a total of 1,047 loci. A significant

809 regression equation was found ( $F(1, 1045) = 5666, p < 0.001$ ), with an adjusted  $R^2$  of

810 0.84.

Positive Control (Targeted Locus KIAA2013)

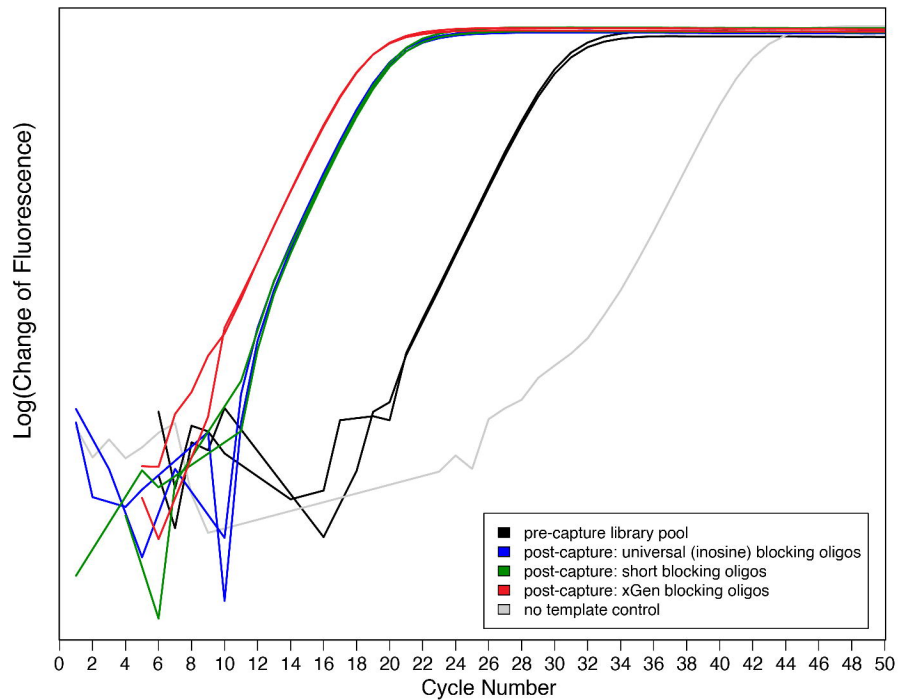

Negative Control (Non-targeted Locus 49065)

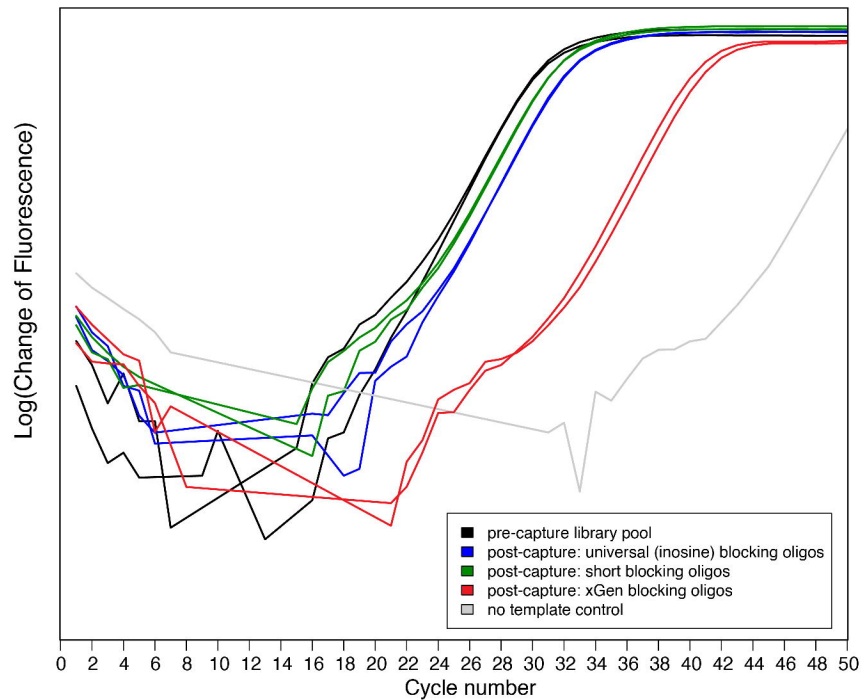

**(A)**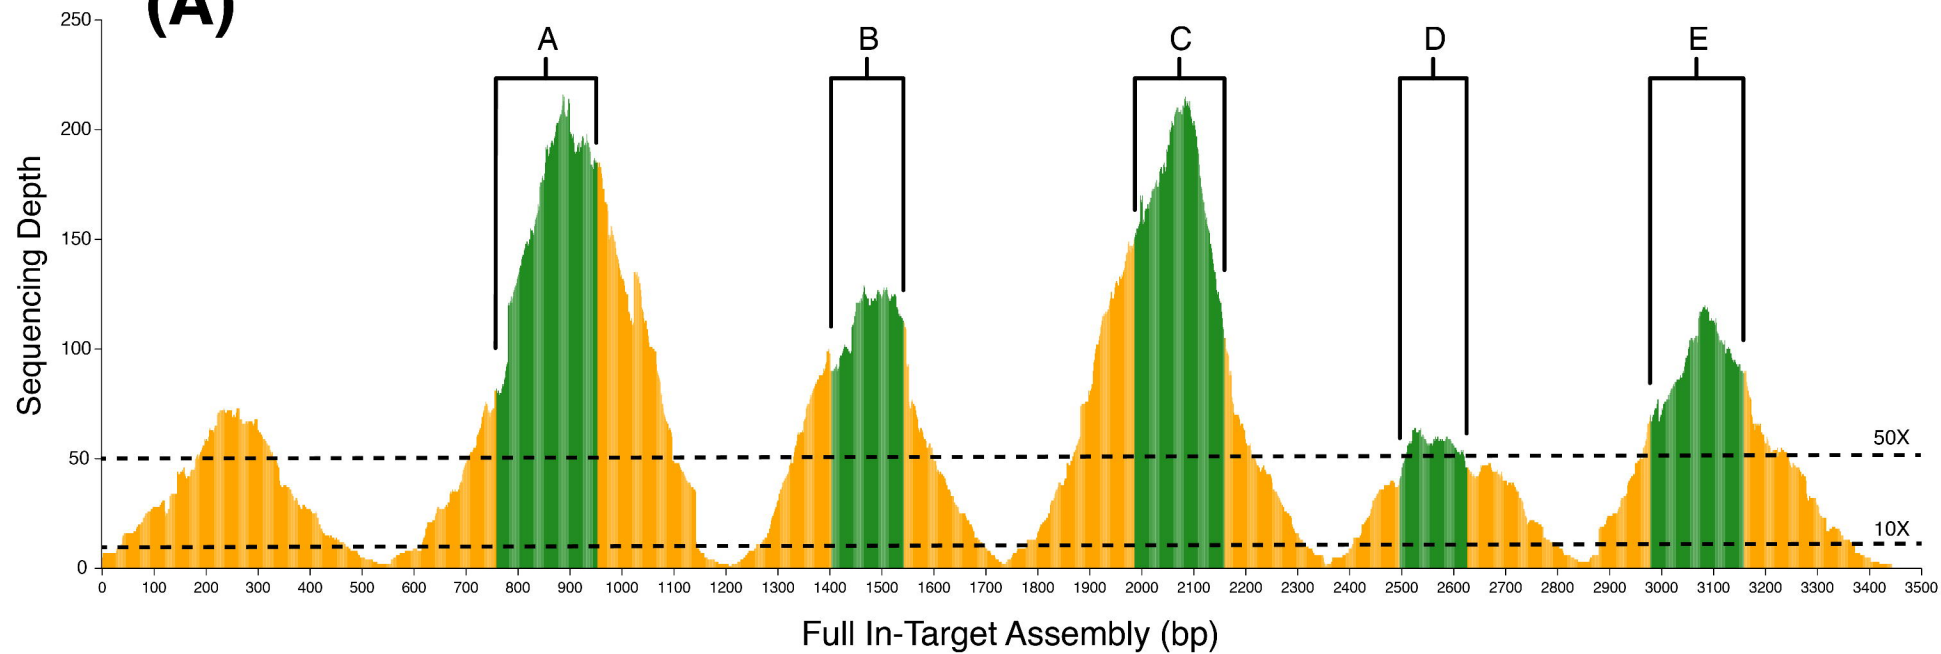**(B)**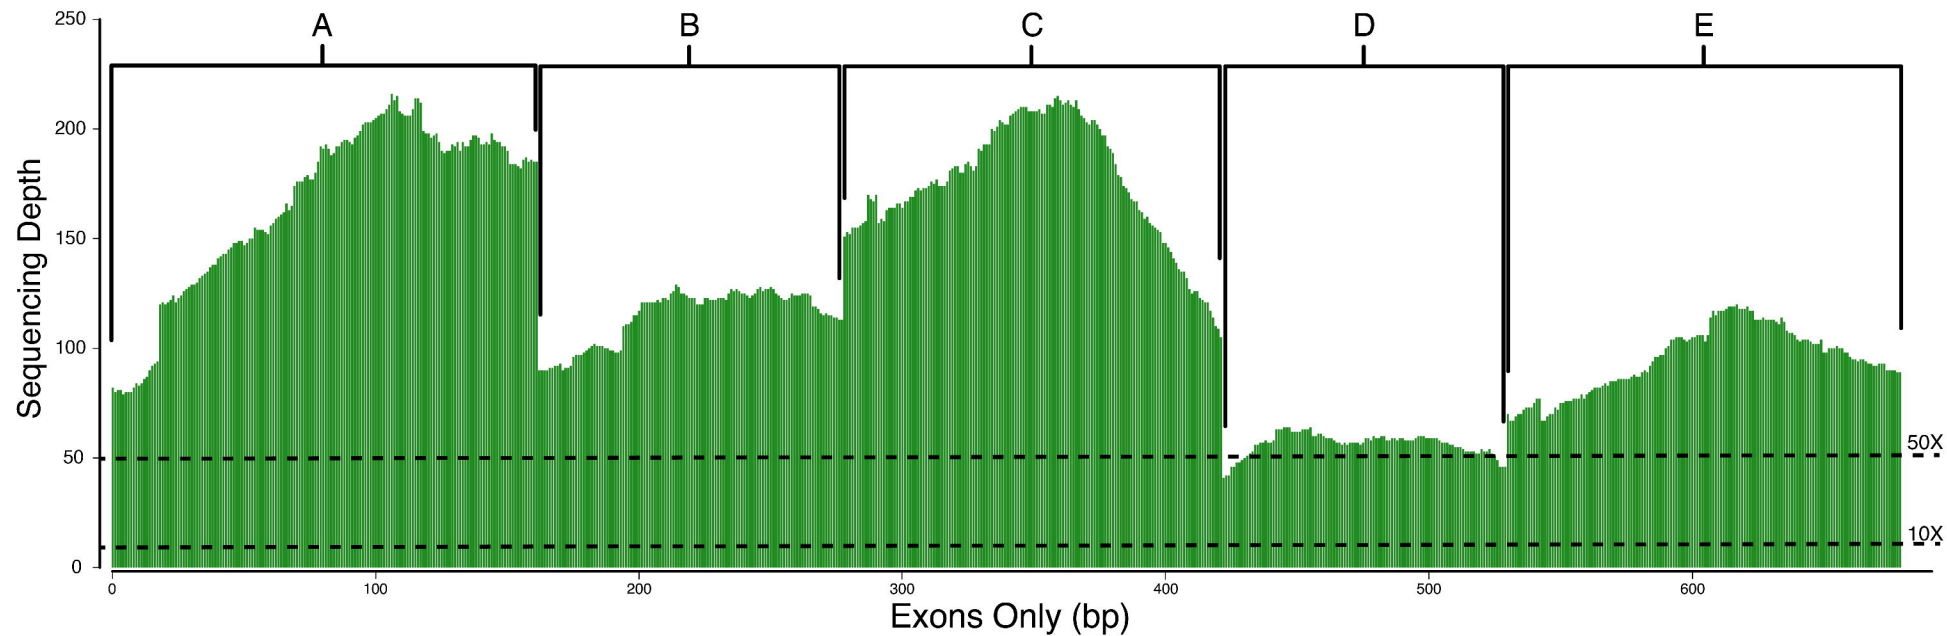

# Frequency of Number of Exons per Transcript

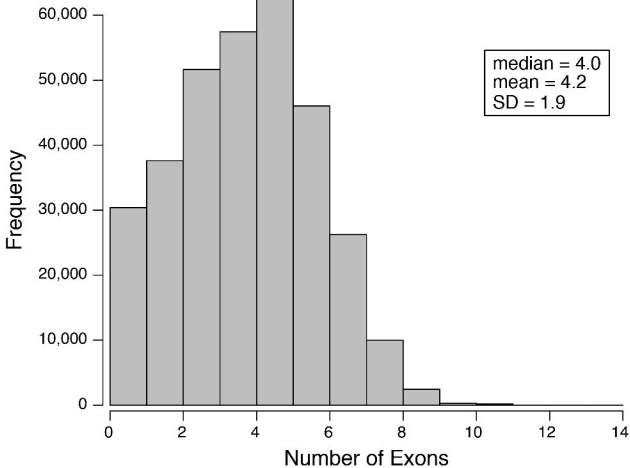



# Frequency Distribution of Exon Lengths

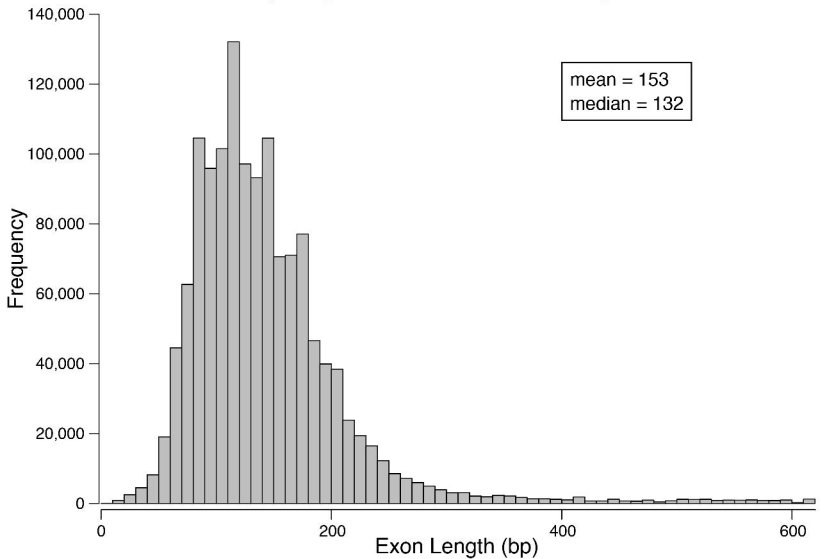

**(A)** Duplication Levels Across Pooling Size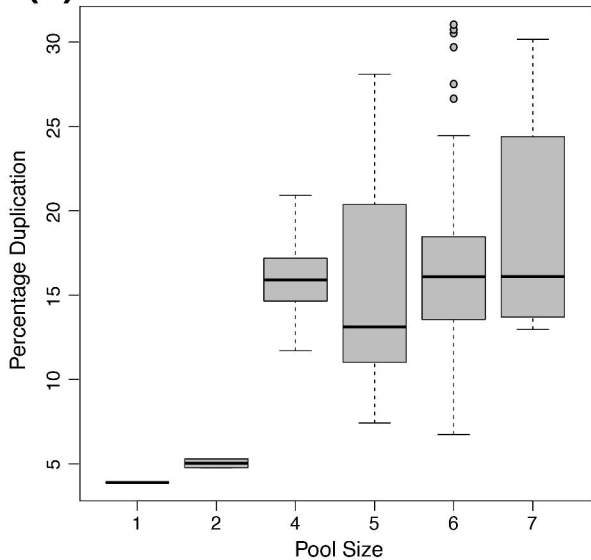**(B)** Raw Data Across Pooling Sizes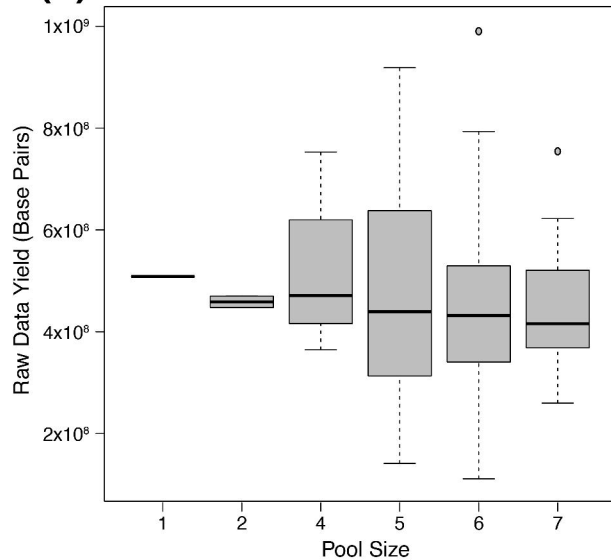**(C)** Sequencing Depth Across Pooling Sizes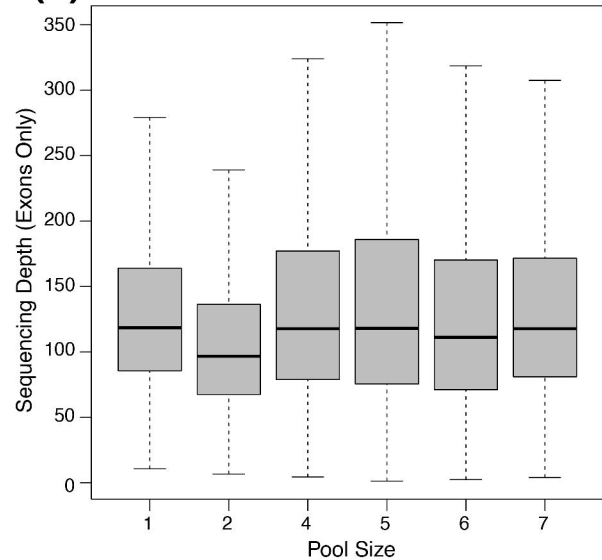

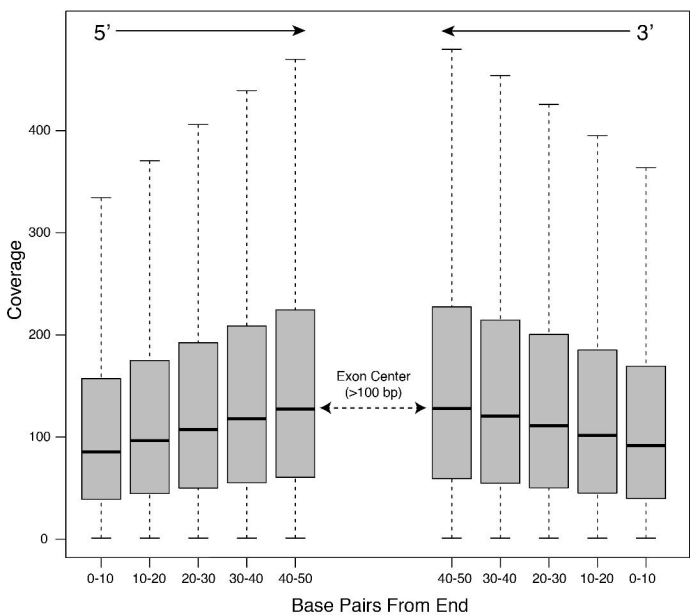

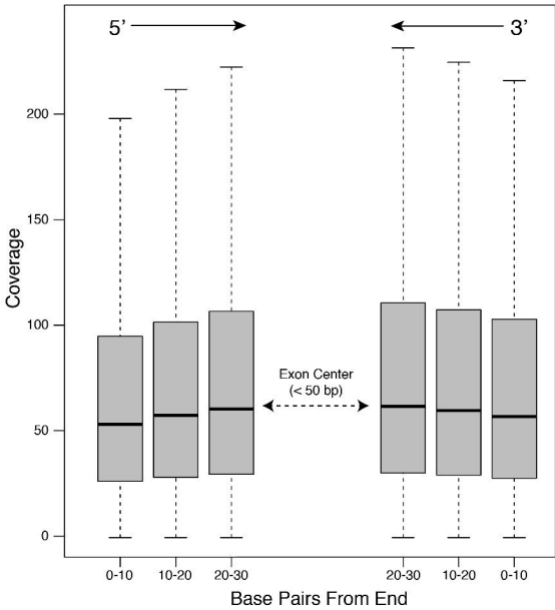

**(A)**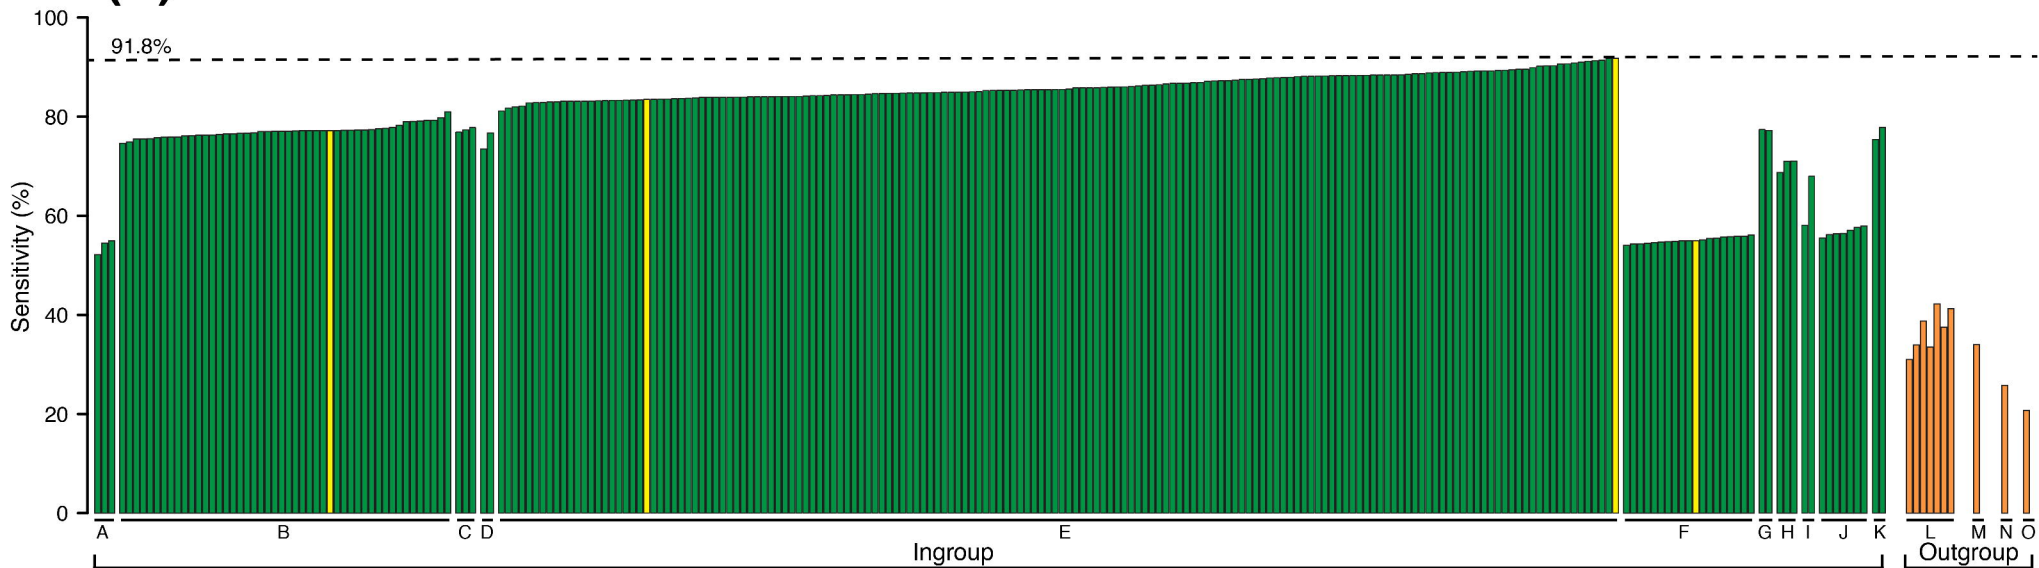**(B)**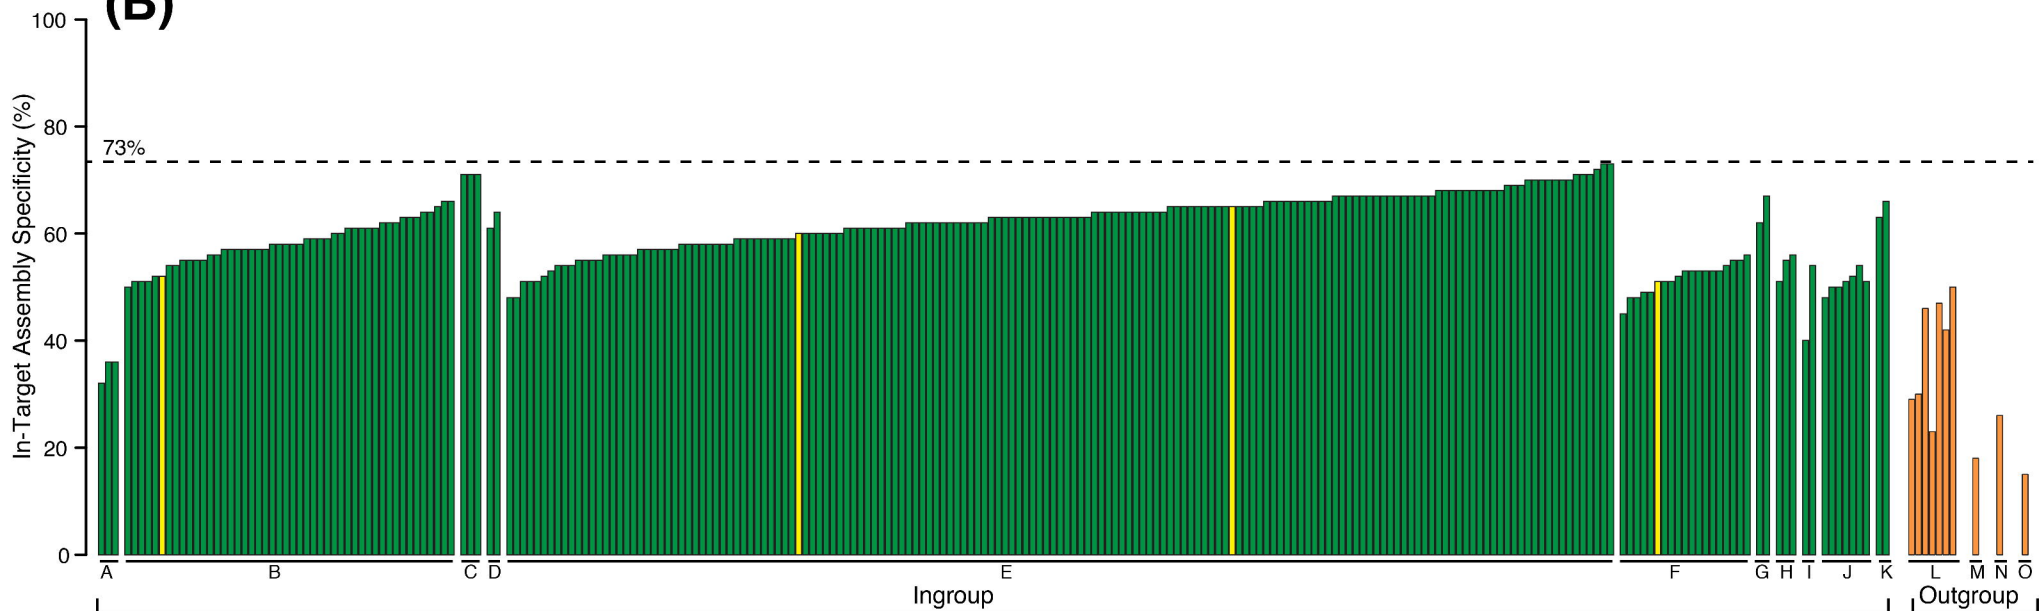

**(A)**

Average Missing Data

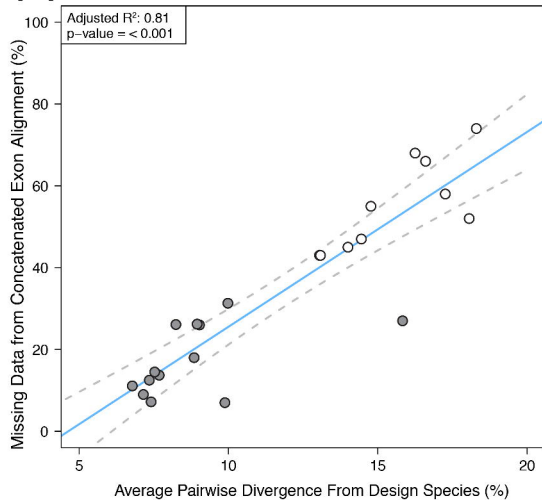**(B)**

Average Sensitivity

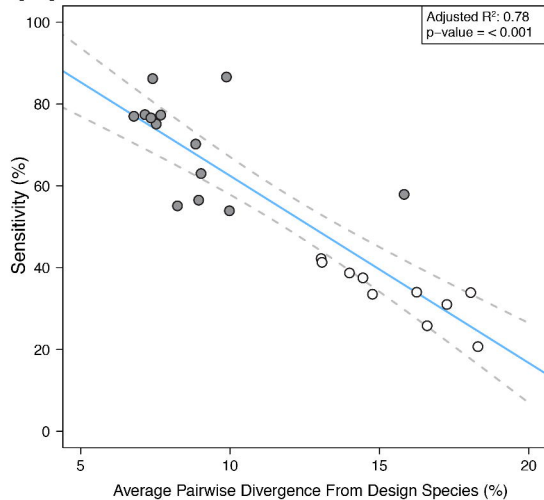**(C)**

Average Specificity

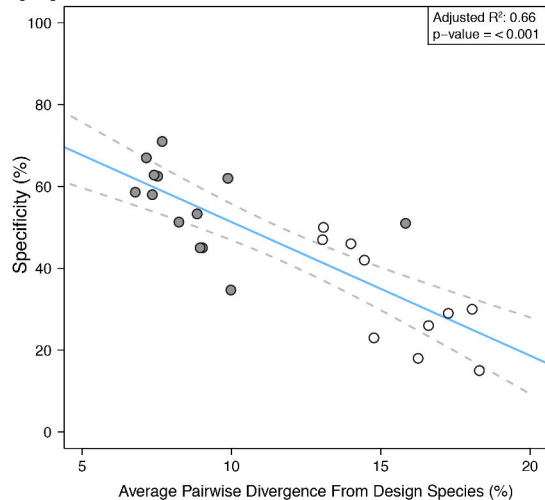

# Alignment Length vs. Informative Sites

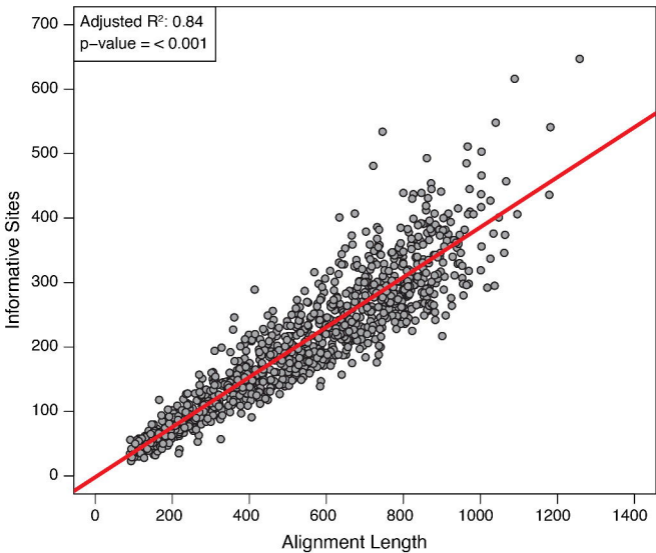

Source: http://biorxiv.org/content/10.1101/031468v1.full.pdf
